# Supplementary material
Source: PubMed Central journal article supplement (PMC5245861)

Figure 1 uncropped

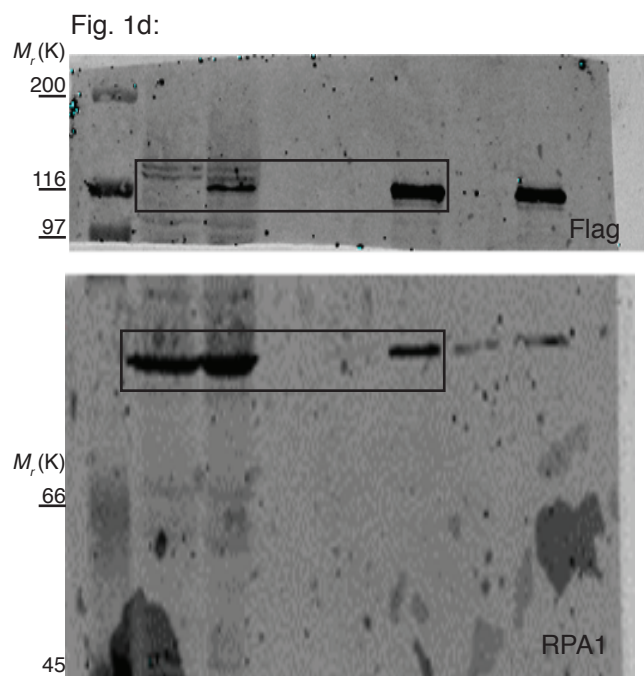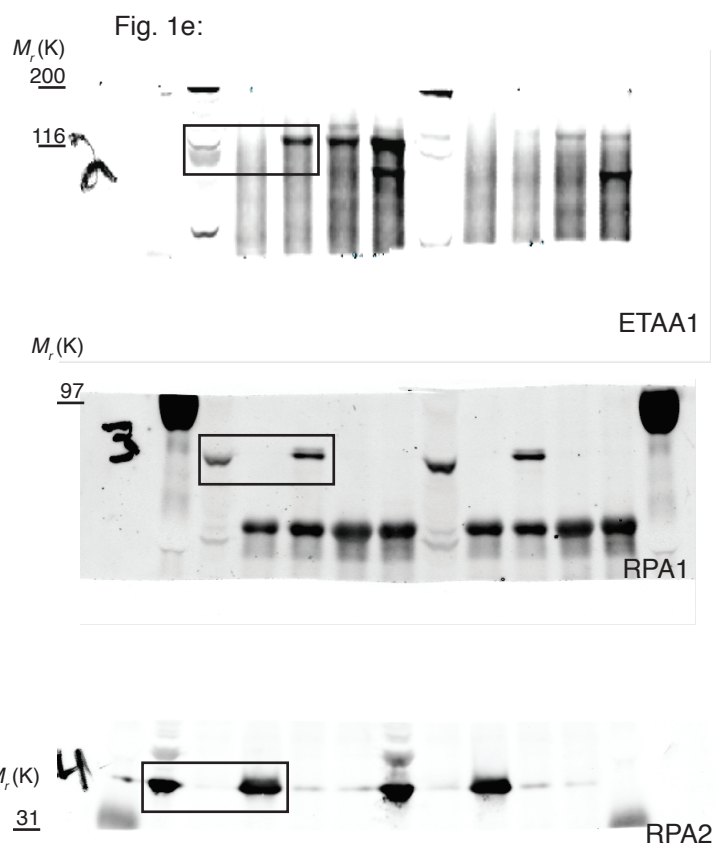

Figure 2 uncropped

Fig. 2e:

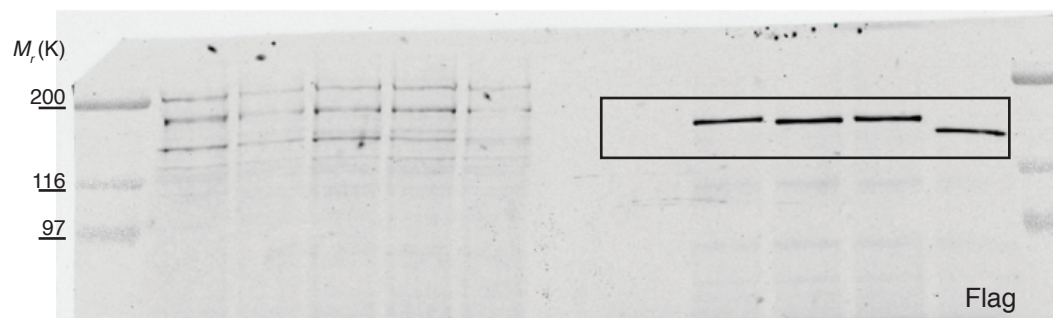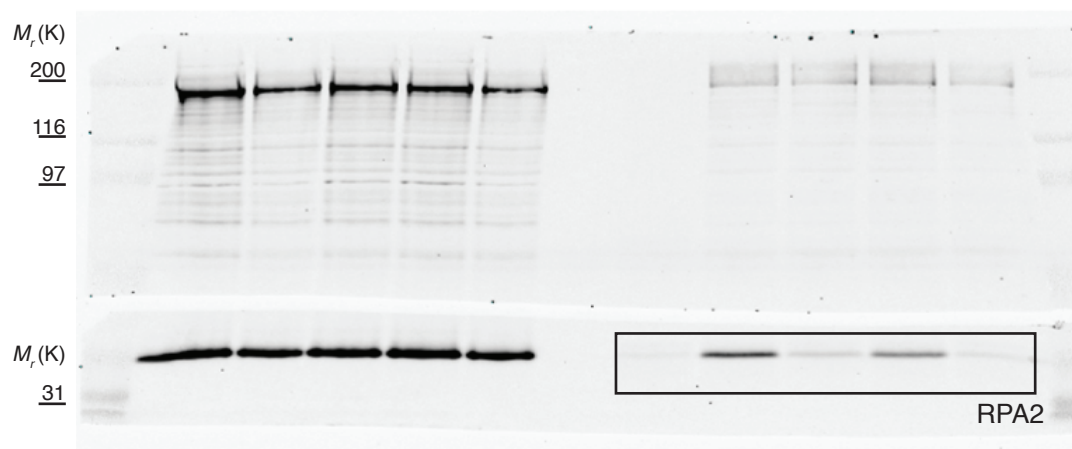

Figure 3 uncropped

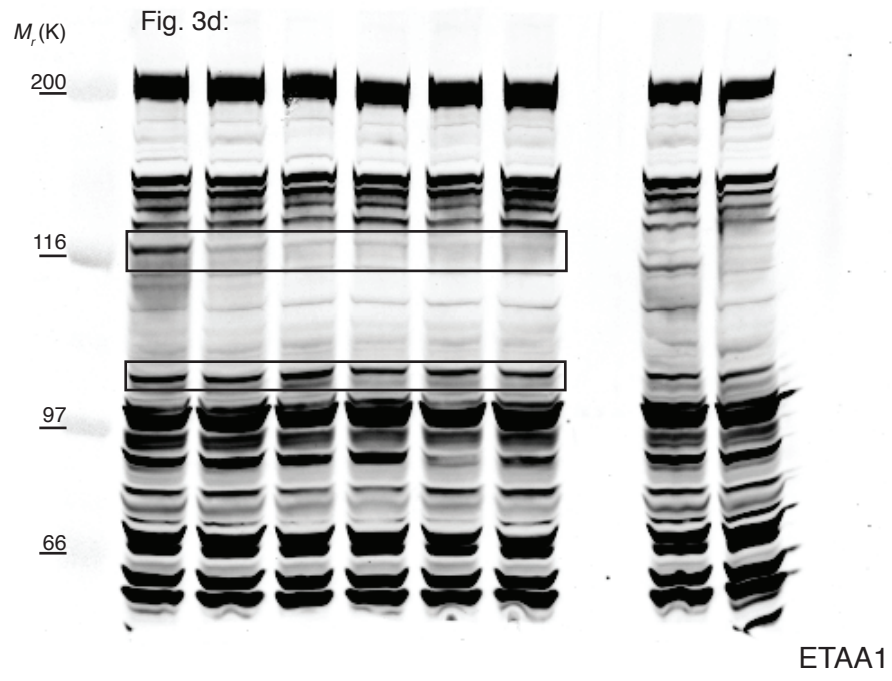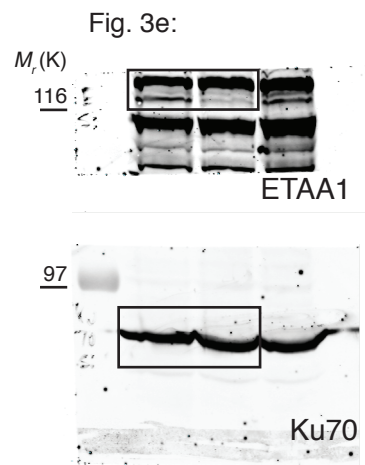

Figure 5 uncropped

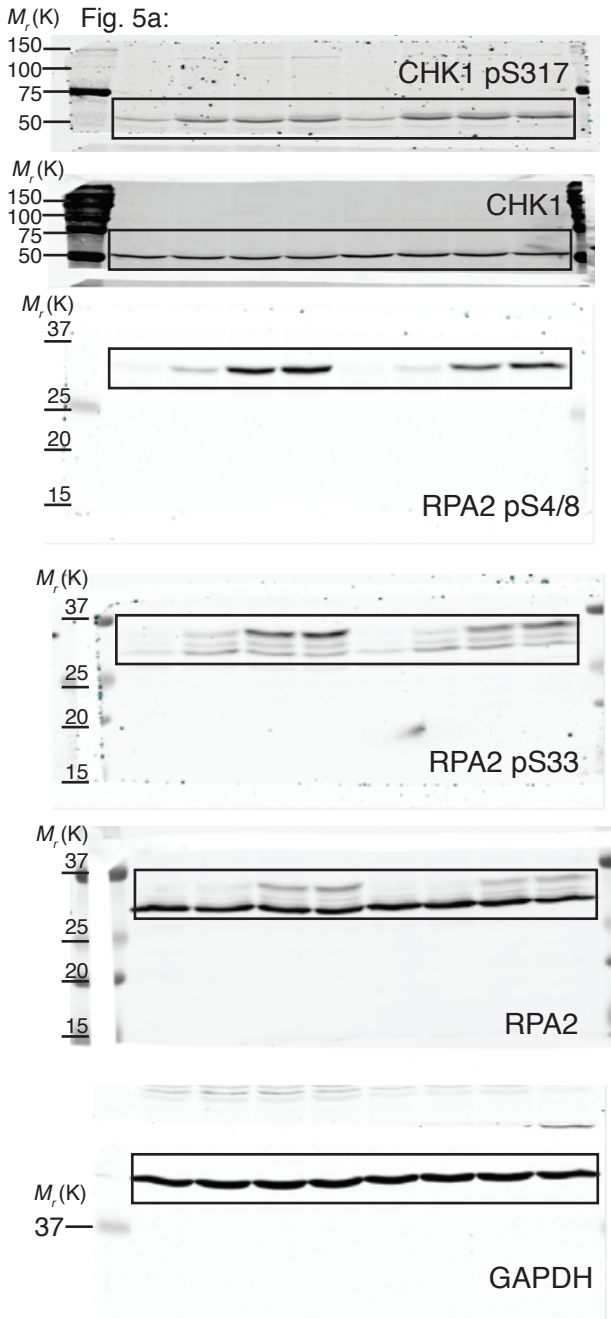

Fig. 5e:

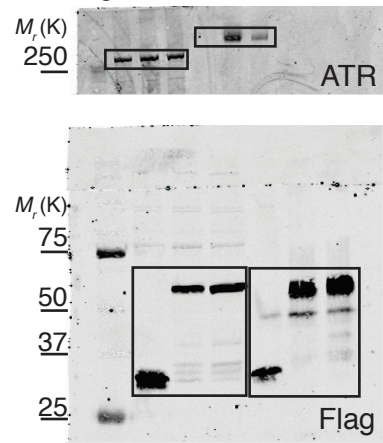

Fig. 5g:

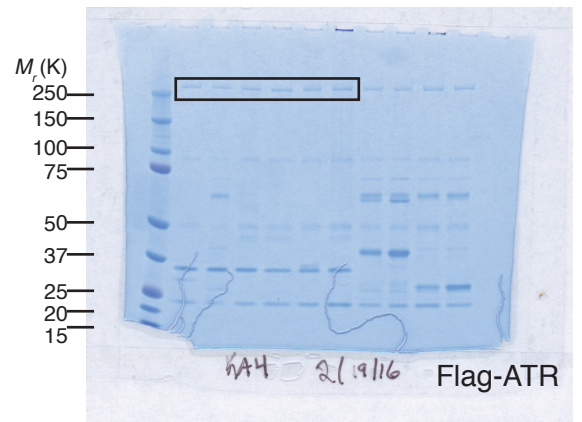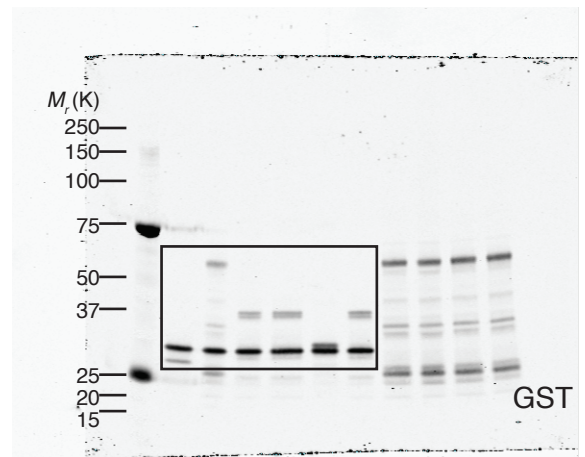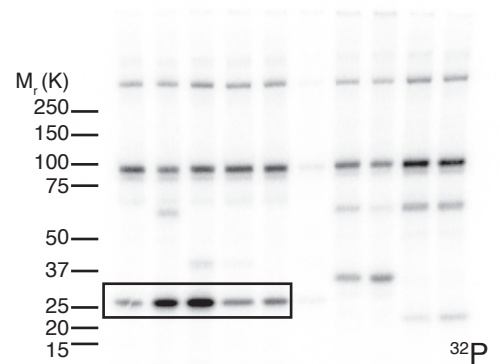

Figure 6 uncropped

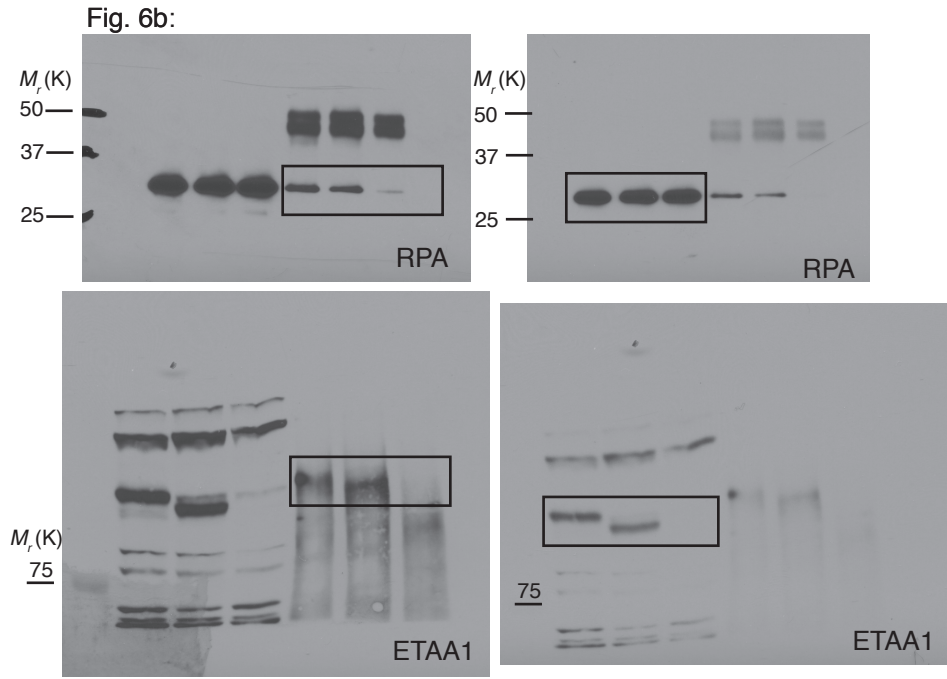

Fig. 6e:

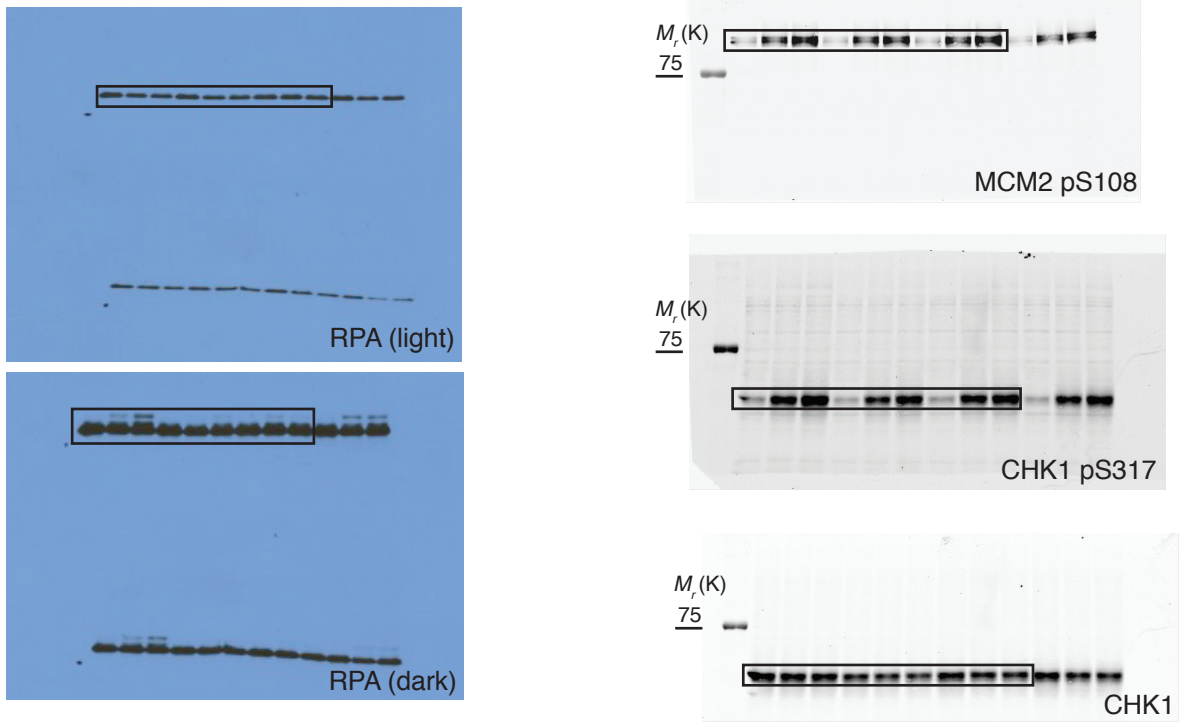

Figure 8 uncropped

Fig. 8a:

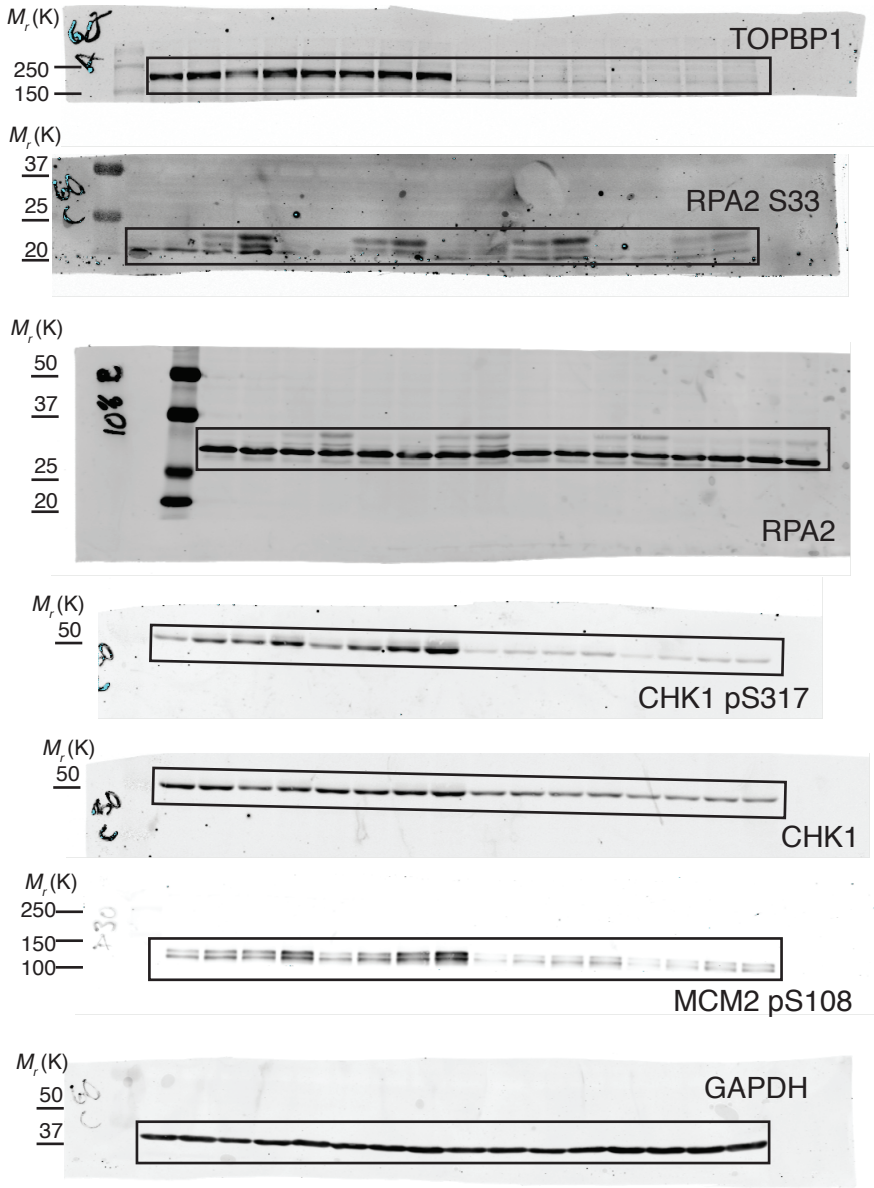

Fig. 8b:

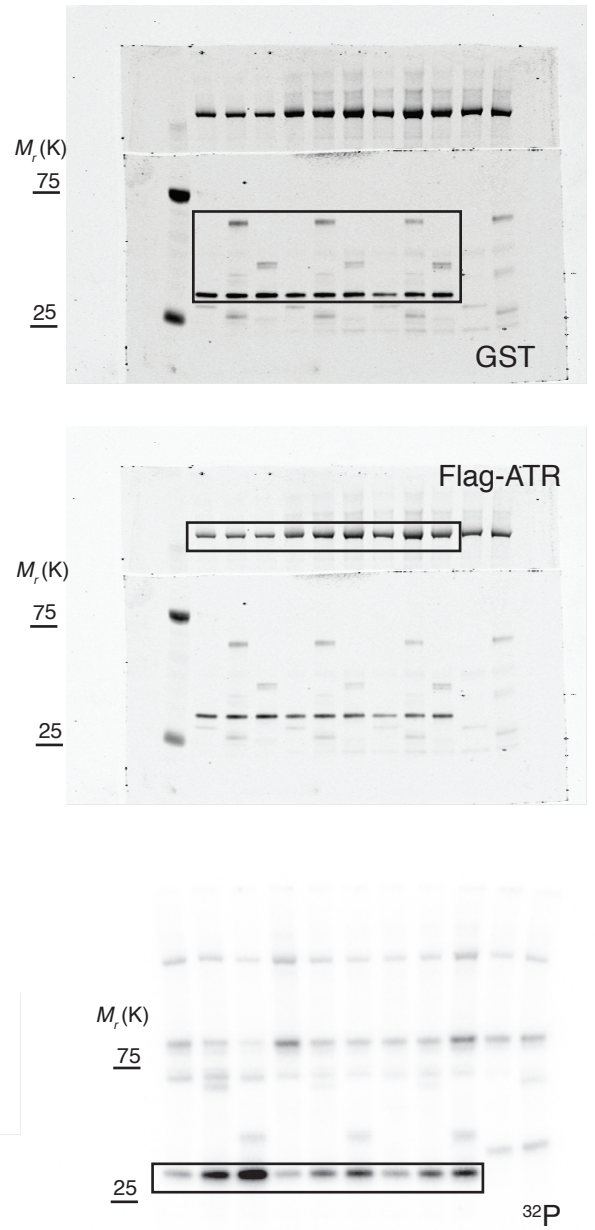

Supplemental Figure 1 uncropped

Figure S1c

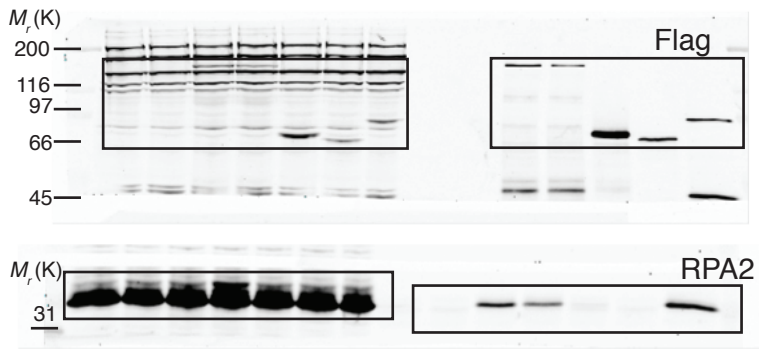

Figure S1d

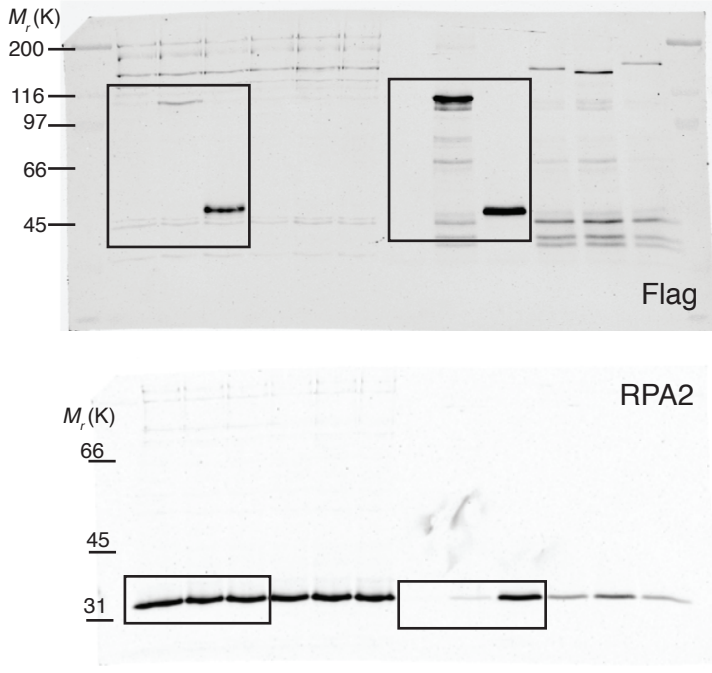

Figure S1e

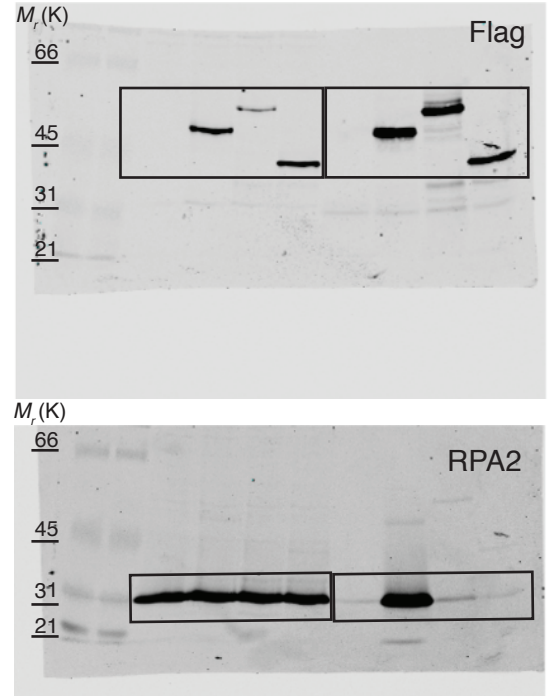

Supplemental Figure 3b

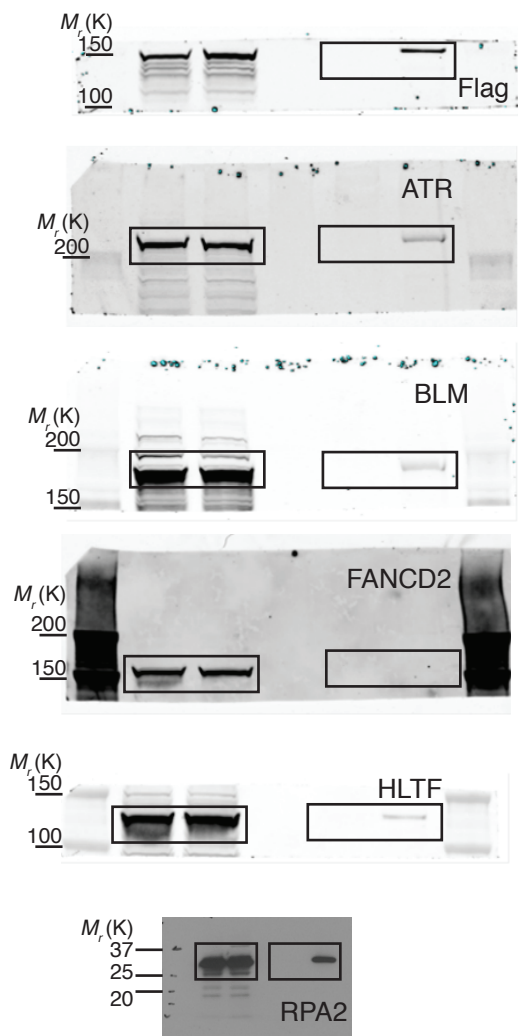

Supplemental Figure 3c

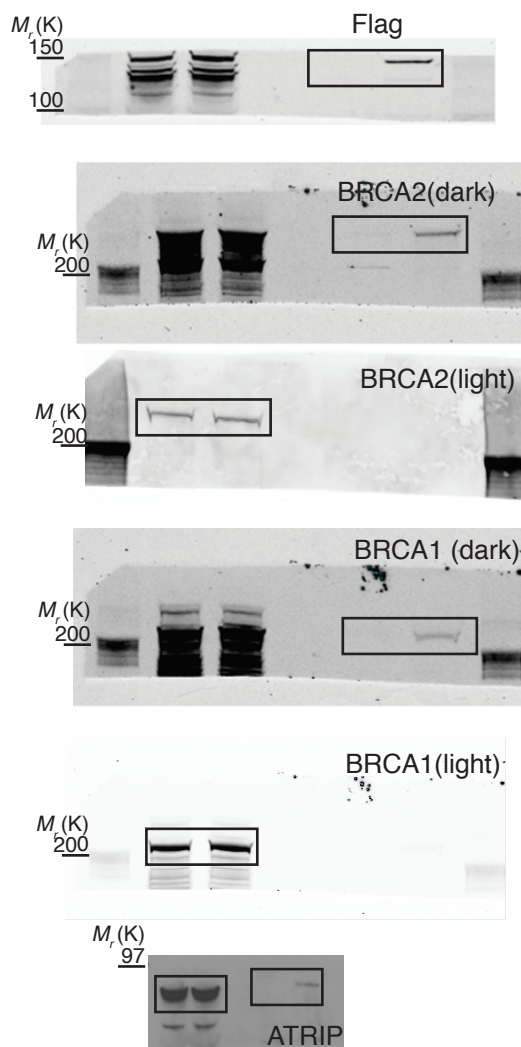



Supplemental Fig 3d

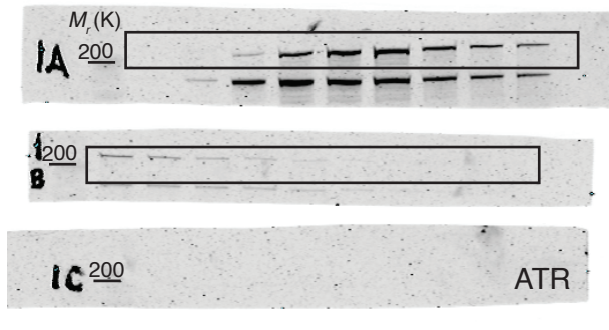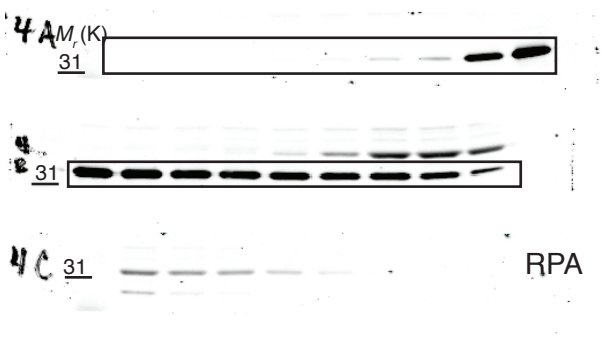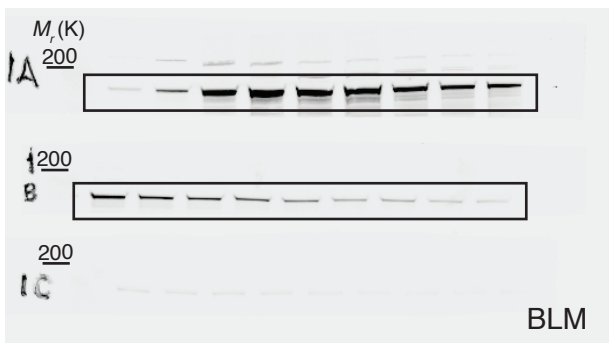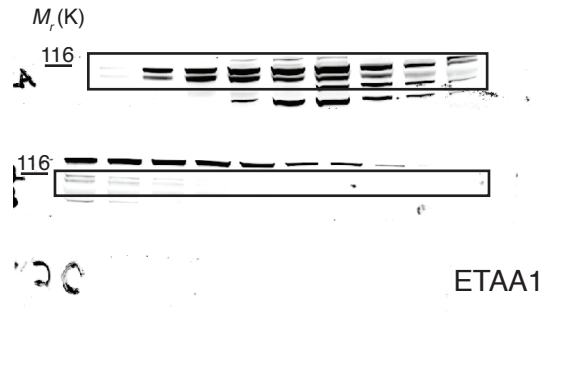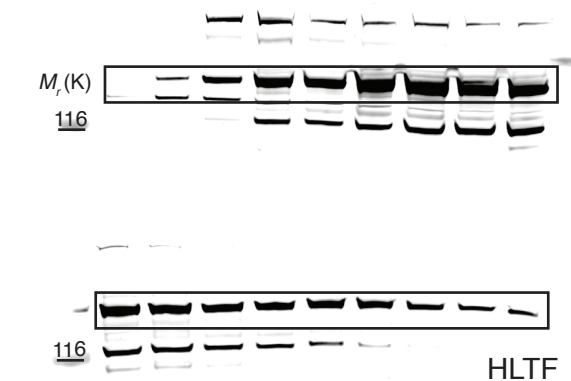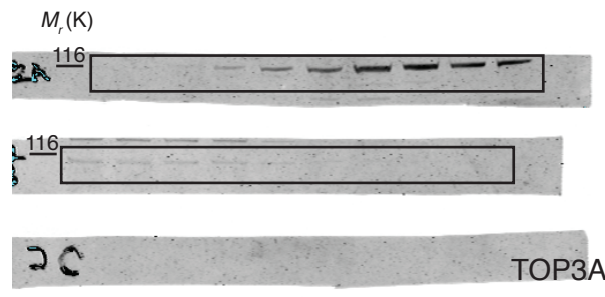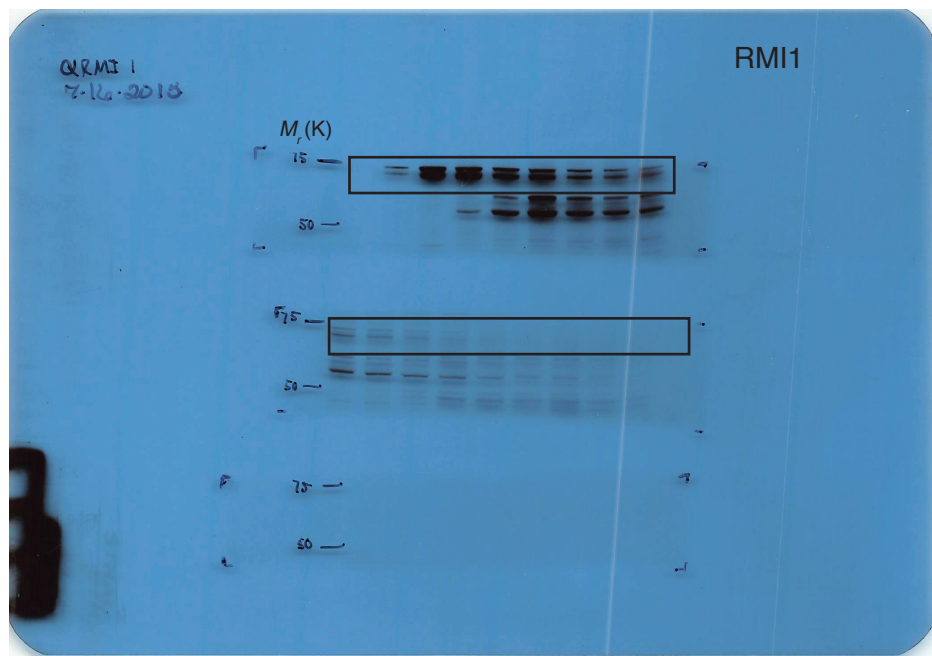

Supplemental Figure 4 uncropped

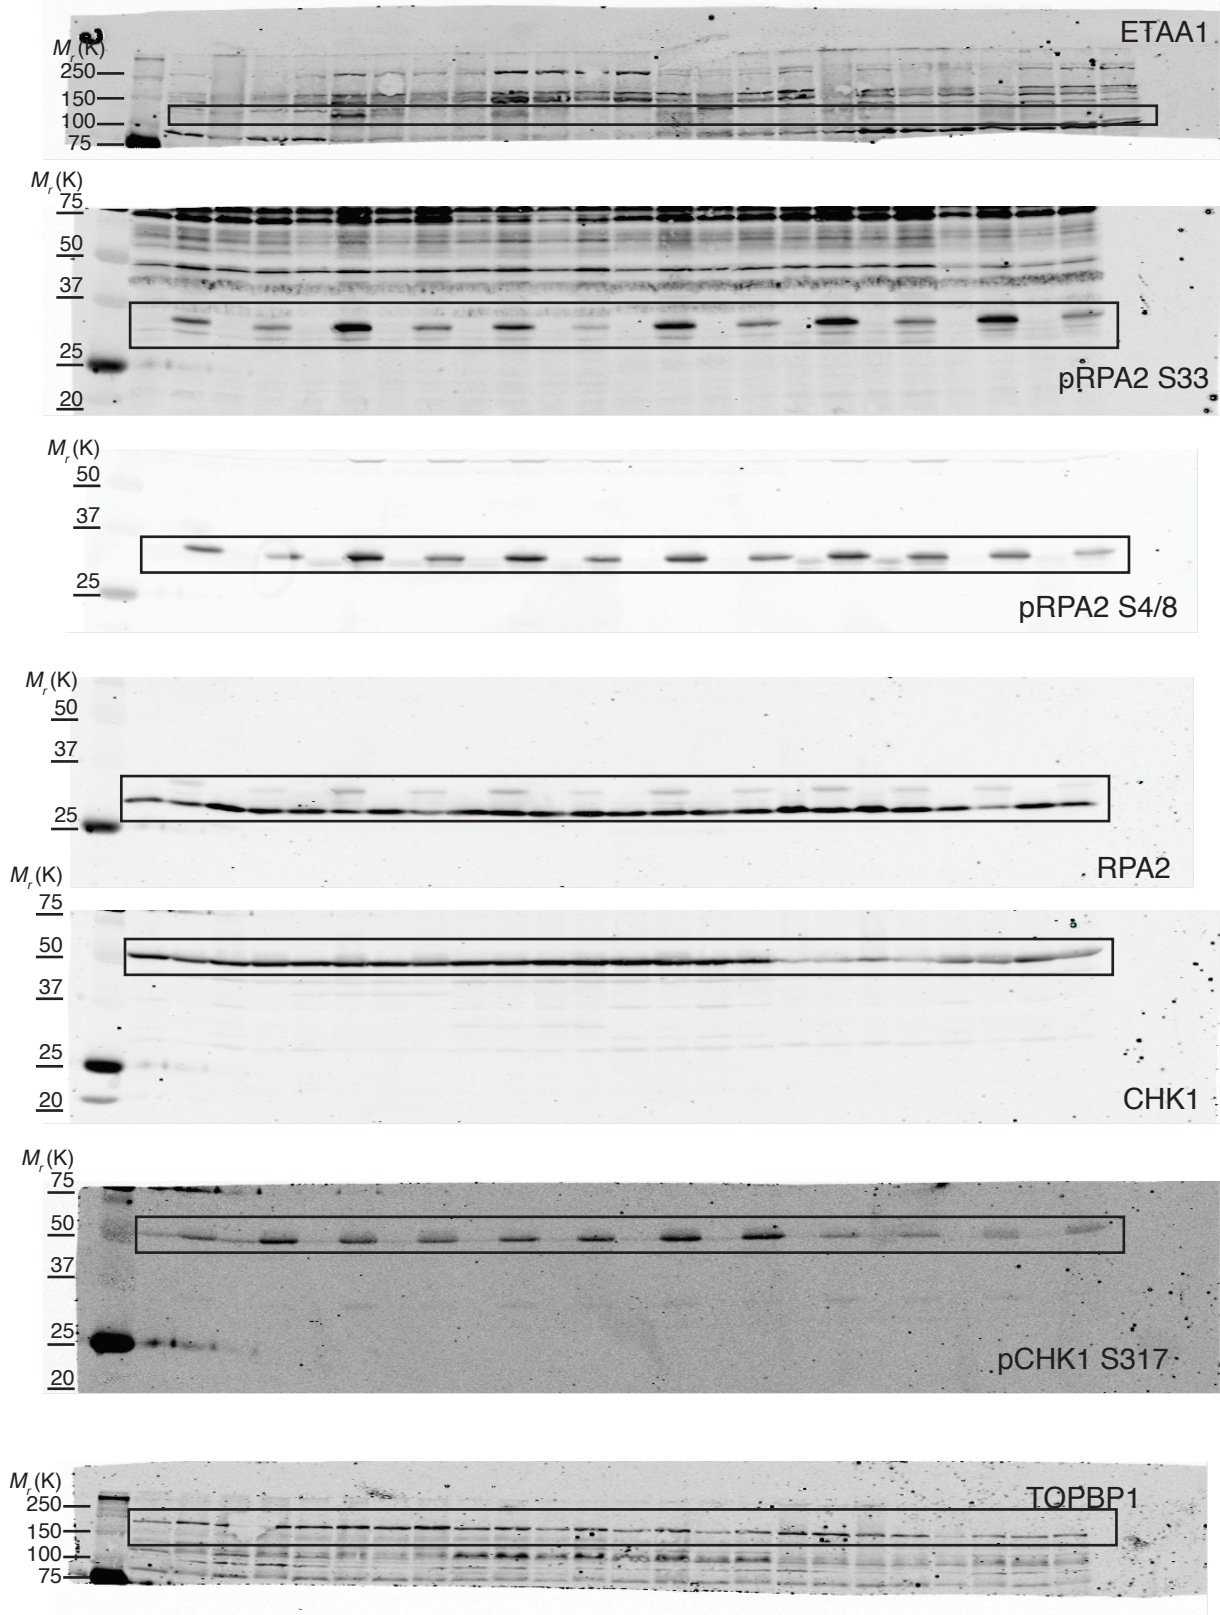

Supplemental Figure 5 uncropped

Supplemental Fig 5e

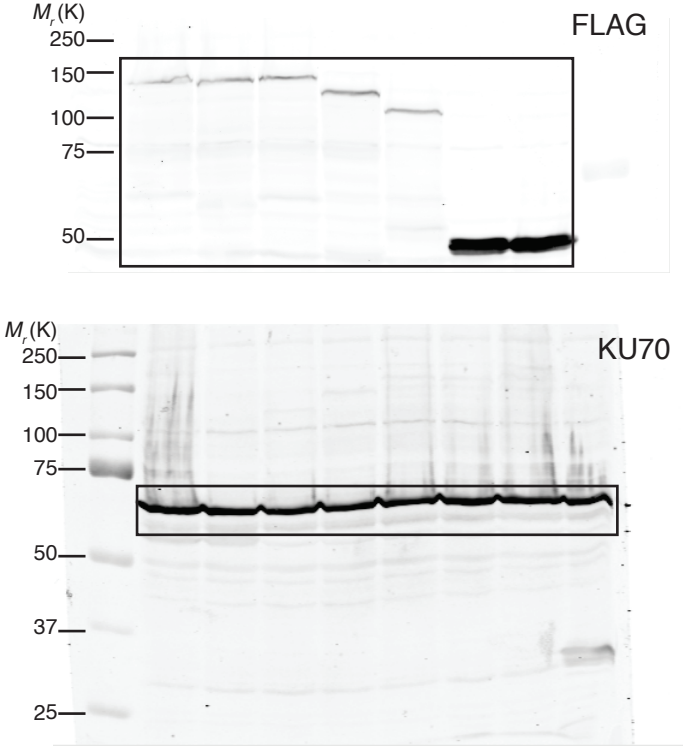

Supplemental Fig 5f

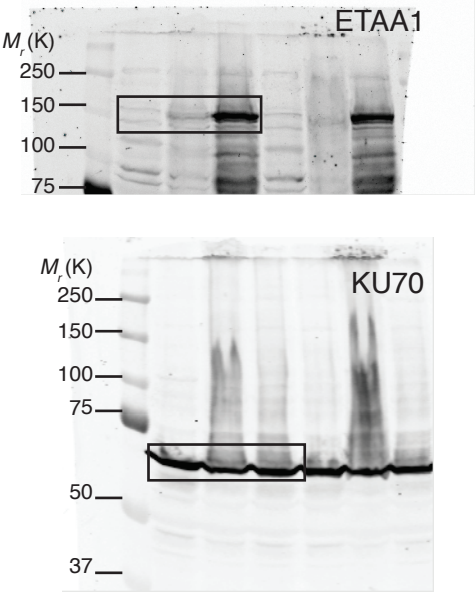

Supplemental Figure 6 uncropped

Supplemental Figure 6b

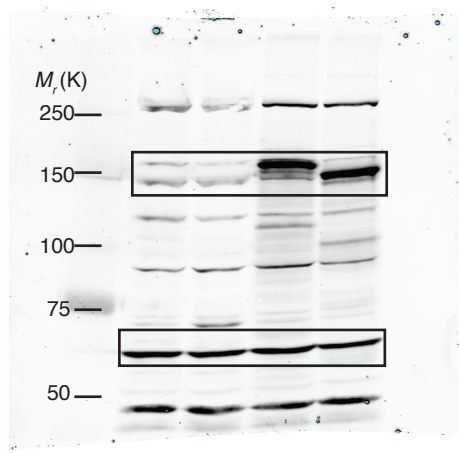

Supplemental Figure 7 uncropped

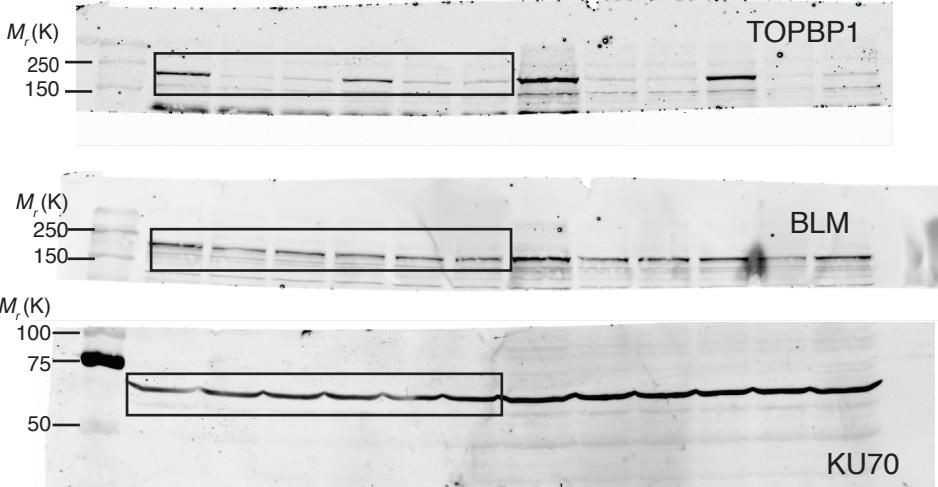

Supplement: NIHMS842121-supplement-Supplemental_figure_8.pdf [file NIHMS842121-supplement-Supplemental_figure_8.pdf]
